# Supplementary material for: Novel underlying genetic markers for asthenozoospermia due to abnormal spermatogenesis and reproductive organ inflammation
Source: PubMed Central journal article supplement — Exp Ther Med. 2024 Feb 19;27(4):146. doi: 10.3892/etm.2024.12434 (PMC10928817; doi:10.3892/etm.2024.12434), 2024-02-19
Supplement: Supplementary_Data3.pdf [file Supplementary_Data3.pdf]

**Table III.** Cq values of clinical semen samples obtained by reverse transcription-quantitative PCR.

| Groups | Sample No. | GAPDH     | HSPA4     | HIF1A      | GSK3B      | SMAD2       | SOX9      |
|--------|------------|-----------|-----------|------------|------------|-------------|-----------|
| Nor    | 1          | 27.919016 | 38.880604 | 35.567318  | 38.5355    | 34.22936    | 29.859282 |
|        |            | 28.169567 | 38.340604 | 35.835221  | 38.5355    | 34.01578    | 29.40776  |
| Nor    | 2          | 30.62148  | 37.056744 | 36.846093  | 36.76118   | 33.552069   | 31.385784 |
|        |            | 30.417027 | 37.396744 | 37.095348  | 36.56453   | 33.973303   | 31.974491 |
| Nor    | 3          | 30.661694 | 36.374805 |            | 37.195004  | 37.769233   | 33.220425 |
|        |            | 30.77612  | 36.86967  | 35.921944  | 37.58597   | 37.43798358 | 32.984133 |
| Nor    | 4          | 27.424313 | 37.273935 | 35.59616   | 34.983734  | 33.3462     | 29.337547 |
|        |            | 27.512056 | 37.253935 | 35.917026  | 35.051     | 33.346207   | 29.718782 |
| Nor    | 5          | 26.680145 | 37.215785 | 35.2315654 | 35.448845  | 32.458916   | 30.594603 |
|        |            | 26.787712 | 37.473935 | 35.679672  | 36.35176   | 32.87329    | 30.155828 |
| Nor    | 6          | 27.975815 | 36.17825  | 37.538791  | 36.645977  | 33.81562    | 30.1135   |
|        |            | 27.911049 | 36.02825  | 37.4653104 | 36.80706   | 33.425889   | 30.271759 |
| Nor    | 7          | 28.375849 | 36.034714 | 35.634028  | 36.7881    | 33.533535   | 30.231571 |
|        |            | 28.465452 | 36.342745 | 36.031418  | 36.649513  | 33.12054    | 30.314085 |
| Nor    | 8          | 29.098135 | 37.447021 | 36.782296  | 35.3344832 | 35.76288046 | 31.239223 |
|        |            | 28.973934 | 37.340395 | 36.469796  | 34.9024832 | 35.888447   | 30.45478  |
| Asth   | 1          | 28.743036 | 39.884632 | 37.4685    | 36.41728   | 38.49661    | 28.890715 |
|        |            | 28.93921  | 39.998352 | 37.312795  | 38.57932   | 38.3315627  | 28.293486 |
| Asth   | 2          | 27.838331 | 38.779352 | 39.606491  | 37.458828  | 39.085455   | 28.448984 |
|        |            | 27.845724 | 38.883421 | 39.72495   | 38.747837  | 39.560452   | 28.829514 |
| Asth   | 3          | 24.422035 | 37.569322 | 39.225773  | 36.382847  | 38.149319   | 26.151073 |
|        |            | 24.499603 | 37.735203 | 39.225773  | 35.309883  | 38.55961    | 26.395489 |
| Asth   | 4          | 29.142149 | 38.952754 | 39.61284   | 38.021454  | 36.379135   | 30.39906  |
|        |            | 28.943153 | 38.85416  | 39.834084  | 38.1995    | 34.849583   | 28.727766 |
| Asth   | 5          | 27.94787  | 37.899647 | 38.533083  | 38.99103   | 39.62506798 | 29.623562 |

|      |   |           |           |             |           |             |           |
|------|---|-----------|-----------|-------------|-----------|-------------|-----------|
|      |   | 28.209442 | 37.829098 | 38.818752   | 38.62844  | 39.92787712 | 29.11257  |
| Asth | 6 | 28.873802 | 38.946281 | 38.45744    | 38.458366 | 39.5448864  | 30.030022 |
|      |   | 29.022425 | 38.945338 | 38.629042   | 38.103214 | 39.72678452 | 30.146725 |
| Asth | 7 | 28.8695   | 39.579432 | 39.656246   | 37.714550 | 39.512069   | 30.4227   |
|      |   | 28.55907  | 39.984625 | 39.288575   | 37.9439   | 39.933303   | 30.765219 |
| Asth | 8 | 27.838331 | 38.942684 | 39.71065104 | 38.505795 | 40.729233   | 28.119835 |
|      |   | 27.445724 | 38.642684 | 38.62529583 | 37.02889  | 40.397983   | 28.786242 |

Nor: normal group; Asth: asthenozoospermia group.
